# Supplementary material
Source: PubMed Central journal article supplement (PMC3177990)
Supplement: NIHMS320105-supplement-2.pdf [file NIHMS320105-supplement-2.pdf]

1  
2  
3 **Supplementary Figure 1.** HPLC profiles reflecting the purification of one of the lactam  
4 analogues of the secretin peptide, c[K<sup>6</sup>,E<sup>9</sup>][Y<sup>10</sup>]sec(5-27) (**4**). Shown are representative  
5  
6 A280 absorbance profiles of the crude products of synthesis on a semi-preparative  
7  
8 reversed-phase column and the final product on an analytical reversed-phase column  
9  
10 (inset). The positions of migration of the compound of interest are marked with  
11  
12 arrowheads in the profiles. This compound had the expected mass by mass spectrometry.  
13  
14  
15  
16  
17  
18  
19

20 Supplemental materials may be accessed free of charge online at <http://pubs.acs.org>.  
21  
22  
23  
24  
25  
26  
27  
28  
29  
30  
31  
32  
33  
34  
35  
36  
37  
38  
39  
40  
41  
42  
43  
44  
45  
46  
47  
48  
49  
50  
51  
52  
53  
54  
55  
56  
57  
58  
59  
60
