# Supplementary material
Source: PubMed Central journal article supplement (PMC3177990)

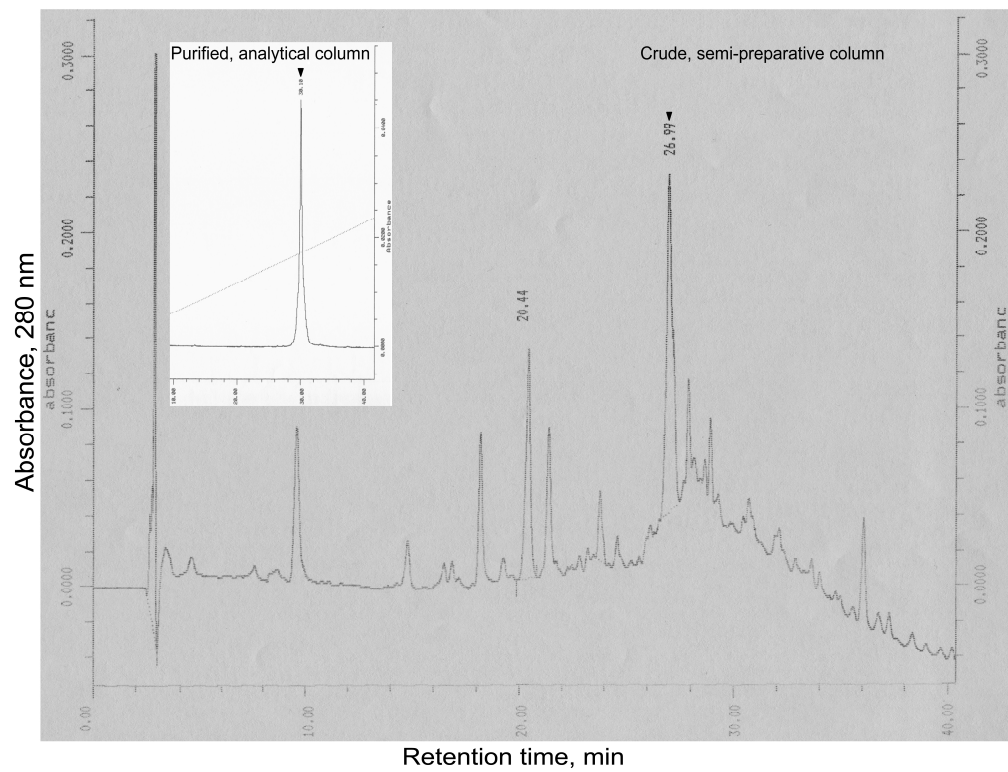

245x188mm (600 x 600 DPI)

Supplement: NIHMS320105-supplement-1_si_001.pdf [file NIHMS320105-supplement-1_si_001.pdf]
